# Supplementary material for: Cis-regulatory mechanisms of left/right asymmetric neuron-subtype specification in C. elegans
Source: Oxford University Press journal article supplement (doi:10.1242/dev.030064), 2008-12-07

*gcy-7* promoter

- C. brenneri*
- C. briggsae*
- C. remanei*
- C. elegans*

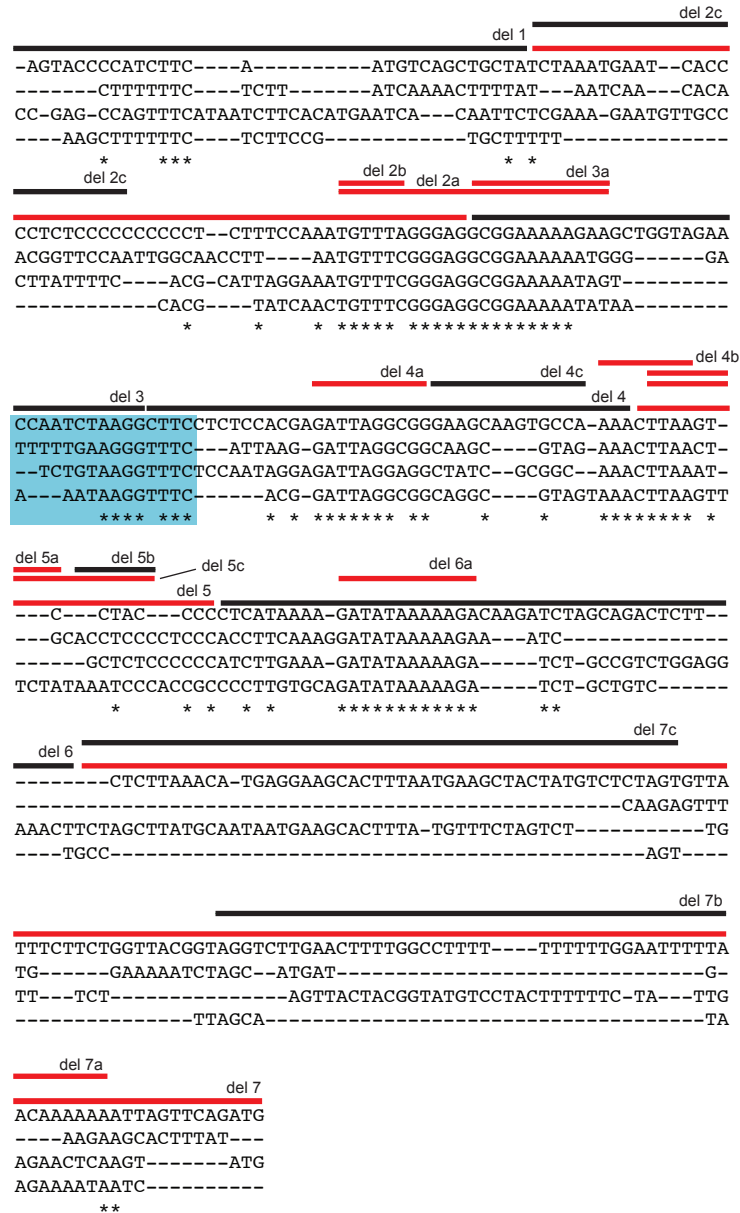

# B

*lim-6* promoter

*C. brenneri*  
*C. briggsae*  
*C. remanei*  
*C. elegans*

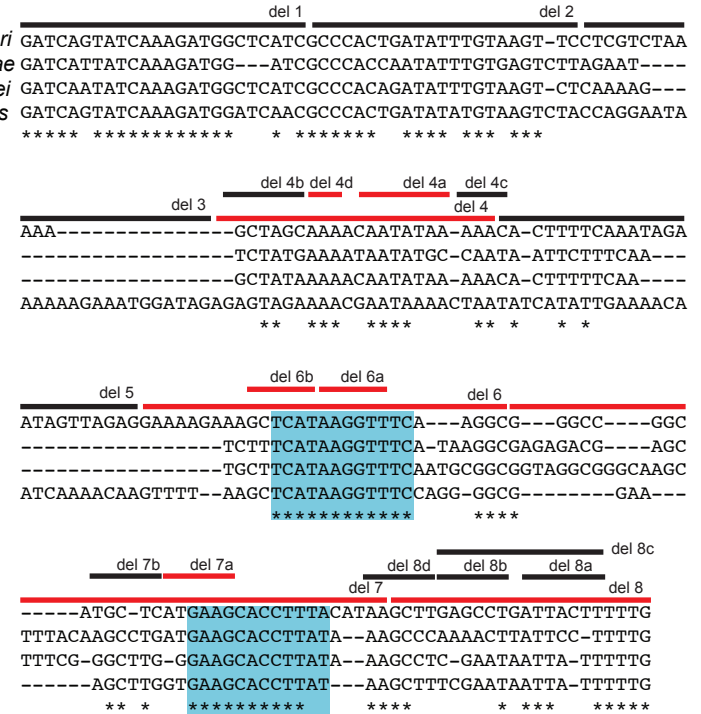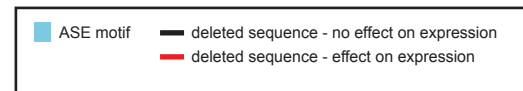

Supplement: dev030064-sup-030064-figs3.pdf [file dev030064-sup-030064-figs3.pdf]
