# Supplementary material for: Cis-regulatory mechanisms of left/right asymmetric neuron-subtype specification in C. elegans
Source: Oxford University Press journal article supplement (doi:10.1242/dev.030064), 2008-12-07
Supplement: dev030064-sup-030064-tables1.pdf [file dev030064-sup-030064-tables1.pdf]

**Table S1. Genetic interaction of *ot101***

| Genotype                        | ASEL fate in ASEL | ASEL fate in ASER | <i>n</i> |
|---------------------------------|-------------------|-------------------|----------|
| Wild type                       | 100%              | 0%                | >100     |
| <i>ot101</i>                    | 17%               | 0%                | 31       |
| <i>ls[die-1r]</i>               | 99%               | 85%               | 62       |
| <i>ls[die-1r]; ot101</i>        | 100%              | 59%*              | 85       |
| <i>ls[ceh-36::lsy-6]</i>        | 99%               | 89%               | 54       |
| <i>ls[ceh-36::lsy-6]; ot101</i> | 76%               | 28%               | 79       |

Marker used: *lim-6::gfp*.

\*Expression of marker dimmer in ASER than in ASEL in 40% of these animals.
