# Supplementary figures and images for: Cis-regulatory mechanisms of left/right asymmetric neuron-subtype specification in C. elegans
Source: Oxford University Press journal article supplement (doi:10.1242/dev.030064), 2008-12-07

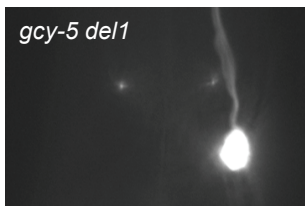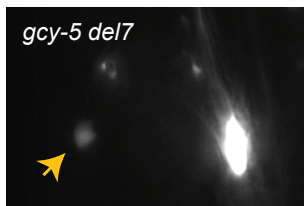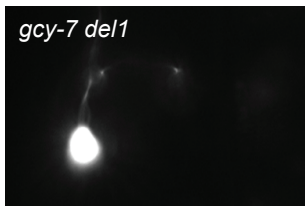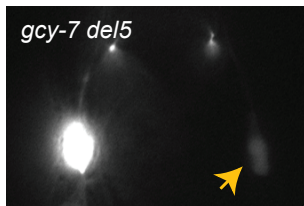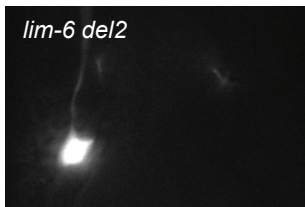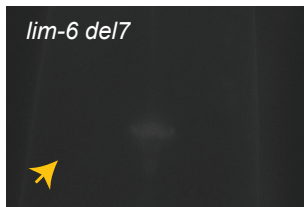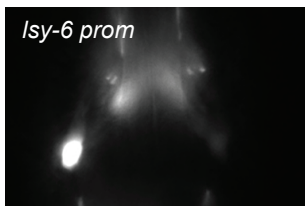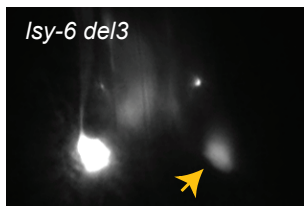

Supplement: dev030064-sup-030064-figs1.pdf [file dev030064-sup-030064-figs1.pdf]

### A *gcy-5*

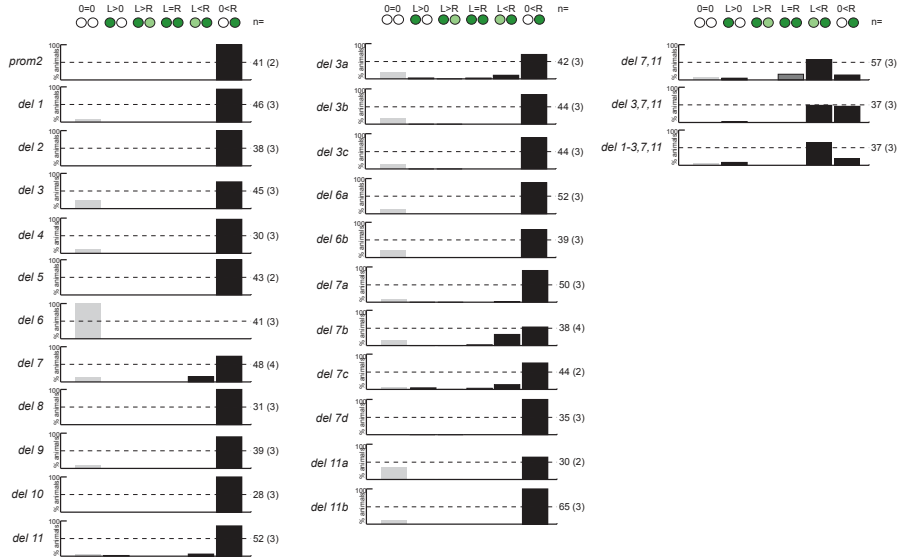

### B *gcy-7*

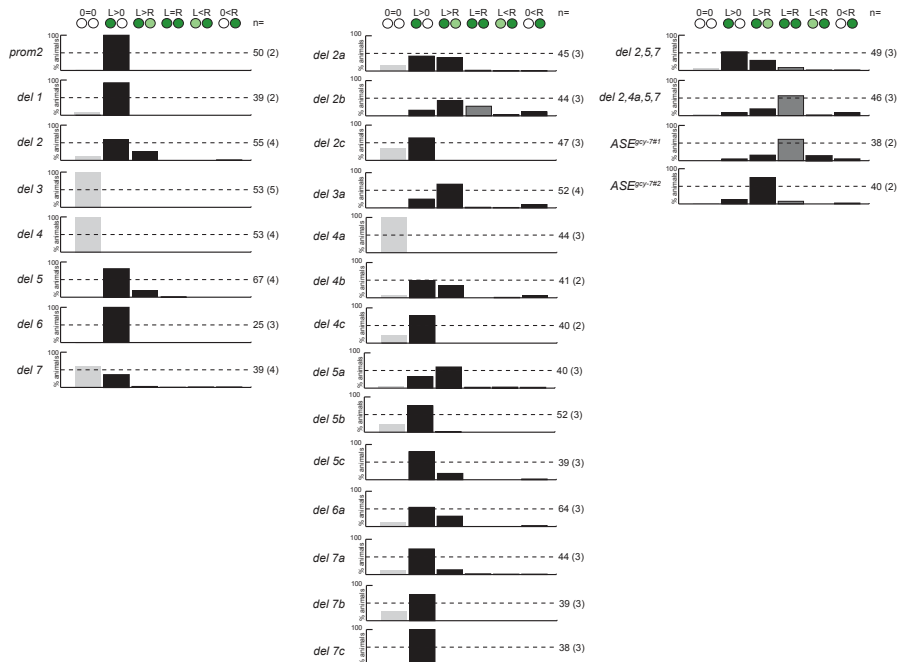

### C *lim-6*

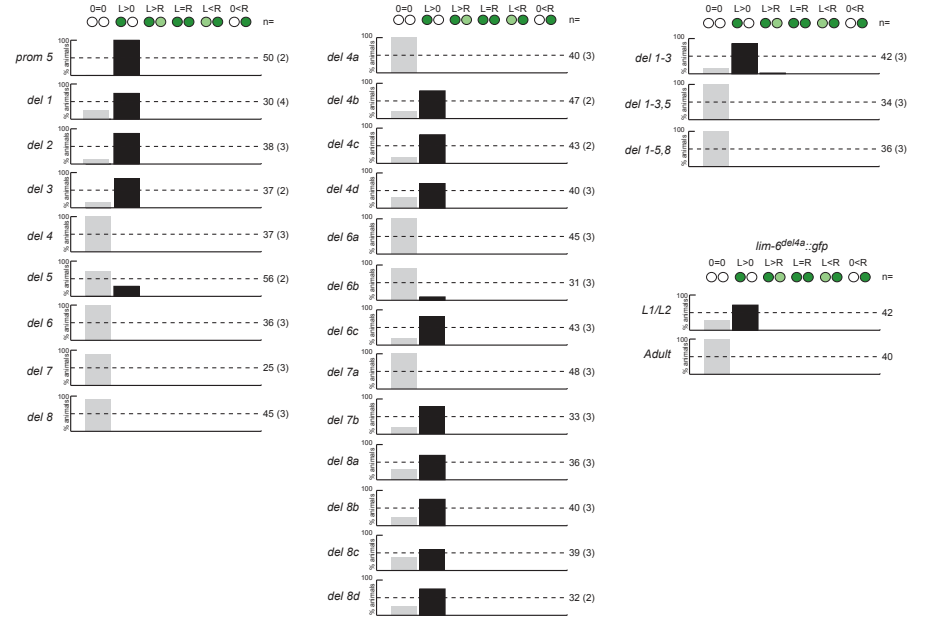

### D *Isy-6*

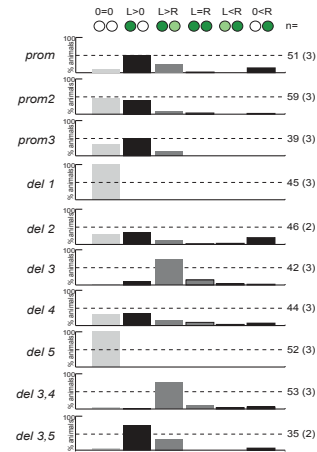

Supplement: dev030064-sup-030064-figs2.pdf [file dev030064-sup-030064-figs2.pdf]
